**Title:**

ShearFAST: a user-friendly *in vitro* toolset for high throughput, inexpensive fluid shear stress experiments.

**Authors:**

Thomas Brendan Smith<sup>1\*</sup>, Alessandro Marco De Nunzio<sup>4</sup>, Kamlesh Patel<sup>1,2</sup>, Haydn Munford<sup>1</sup>, Tabeer Alam<sup>1</sup>, Ohema Powell<sup>1</sup>, Nicola Heneghan<sup>3,4</sup>, Andrew Ready<sup>2</sup>, Jay Nath<sup>2</sup>, Christian Ludwig<sup>1</sup>

**Affiliations:**

<sup>1</sup> Institute of Metabolism and Systems Research, University of Birmingham, England

<sup>2</sup>Department of Renal Surgery, Queen Elizabeth Hospital Birmingham, England

<sup>3</sup>Centre of Precision Rehabilitation for Spinal Pain (CPR Spine), School of Sport, Exercise and Rehabilitation Sciences, University of Birmingham, England

<sup>4</sup>LUNEX International University of Health, Exercise and Sports, Differdange, Luxembourg

**\*Corresponding author details:**

Name: Thomas Brendan Smith

Email: [Thomas10.smith26@gmail.com](mailto:Thomas10.smith26@gmail.com)

Author involvement is detailed below. No external entity was involved in the writing of this paper.

Conception, design and coding of the software: TS

Conception and design of the study: TS

Acquisition of data: TS, AMDN, NH, HM, TA, OP

Analysis and interpretation of data: TS, AMDN, KP, HM, TA, OP, NH, AR, JN, CL

Drafting the article: TS

Critical revision of article for intellectual content: TS, AMDN, KP, HM, TA, OP, NH, AR, JN, CL

Final approval of version to be submitted: TS, AMDN, KP, TA, HM, OP, NH, AR, JN, CL

## Abstract

Fluid shear stress is a key modulator of cellular physiology *in vitro* and *in vivo*, but its effects are under-investigated due to requirements for complicated induction methods.

Herein we report the validation of ShearFAST; a smartphone application that measures the rocking profile on a standard laboratory cell rocker and calculates the resulting shear stress arising in tissue culture plates.

ShearFAST measured rocking profiles were validated against a graphical analysis and also against measures reported by an 8-camera motion tracking system.

ShearFAST angle assessments correlated well with both analyses ( $r \geq 0.99$ ,  $p \leq 0.001$ ) with no significant differences in pitch detected across the range of rocking angles tested.

Rocking frequency assessment by ShearFAST also correlated well when compared to the two independent validity techniques ( $r \geq 0.99$ ,  $p \leq 0.0001$ ), with excellent reproducibility between ShearFAST and video analysis (mean frequency measurement difference of  $0.006 \pm 0.005\text{Hz}$ ) and motion capture analysis (mean frequency measurement difference of  $0.008 \pm 0.012\text{Hz}$ )

These data make the ShearFAST assisted cell rocker model make it an attractive approach for economical, high throughput fluid shear stress experiments.

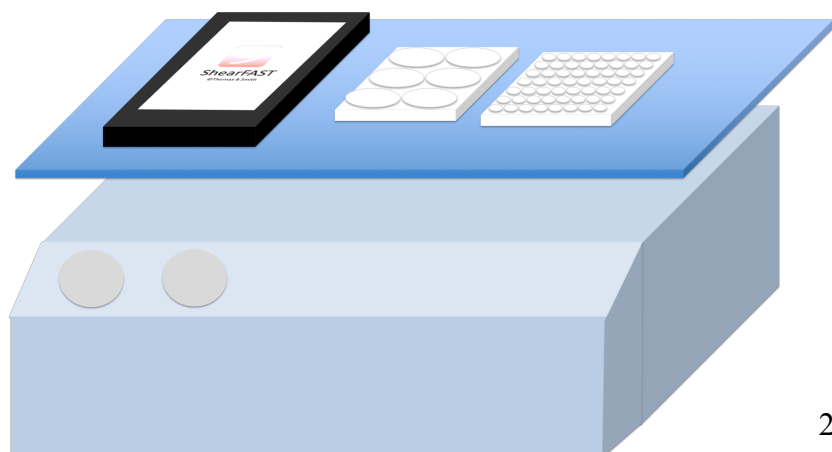

## Introduction

Fluid shear stress (FSS) is described as the deforming force generated against a solid boundary by motile fluid. As an inescapable consequence of fluid flow, FSS is known to modulate cellular physiology in diverse cell types (1–7) and is a key aetiological (8–13), prognostic and therapeutic determinant in multiple disease states (14–18). Despite this, the impact of this key environmental component on cellular physiology remains underrepresented in the majority of cell line based research.

This became apparent in our studies of the impact of machine perfusion techniques on renal tissue destined for transplantation. The presence of fluid flow via low pressure (30 mmHg) pulsatile perfusion is a definitive difference that separates hypothermic machine perfusion (HMP), a mode of *ex-vivo* organ preservation, from more traditional static cold storage techniques. Preservation using HMP results in more favorable post-transplant outcomes when compared to static storage (19–22), and the exertion of fluid flow is a likely mechanism by which HMP promotes such benefit (23–25). However, the optimal HMP environment, including the optimal degree of FSS for each structure within the kidney is yet to be defined by animal models or clinical trials. Finding a solution to this problem may be facilitated through the use of high throughput *in vitro* models.

Cell lines potentiate high throughput screening tools to help direct refinement of organ preservation protocols (26–28), however are generally performed under the absence of fluid flow. This is reflective of standard lab practice; multi-well dishes are an efficient means to subject cultured cells to large numbers of different environments and in general, experiments are performed using assays and equipment compatible with the multi-well plate format.

Although tools exist that allow for simulation of fluid shear stress *in vitro* (29–33), these require bespoke equipment and are limited by their complicated, low throughput, expensive or unscalable nature. These restrictions become particularly pronounced when large scale shear stress experiments are desired.

A cell rocker based method for the delivery of defined degrees of FSS has been described (34) and is utilised in several reports (4,35–39). This approach uses a mathematical model to calculate the resulting fluid shear stress when the rocking parameters (i.e. angle and speed), fluid parameters (i.e. volume and viscosity) and plate dimensions are known.

Many cell rockers possess with a means to adjust rocking angle or speed; however our experience has demonstrated that when even when rocking profile is modifiable, the setting selected may either be incompatible with the model, lack the resolution required or be grossly inaccurate (Figure 6).

Difficulties in delivering the mathematical and analytical accuracy required for the proper execution of cell rocker FSS models may help explain the underutilisation of this otherwise accessible tool in in biomedical research.

Fortunately, the technology to address these problems is currently in place in laboratories throughout the world. Competition between major smartphone manufacturers has led to the ubiquitous presence of handheld devices capable of assessing spatial orientation (40) and performing complex mathematical operations. Since the cell rocker-based approach does not require additional equipment other than the tissue culture dish itself, using smartphones to measure rocking profiles is a simple intuitive step that enables greater experimentation with FSS in cell line studies.

This paper describes the validation of ShearFAST (Shear **F**ormula, **A**ngle, **S**peed **T**oolset), a novel smartphone-based application which enables rapid characterisation of the rocking profile set on a standard laboratory cell rocker, and integrates its findings into the well-established mathematical model of cell rocker based FSS induction.

## **Methods**

### **ShearFAST**

ShearFAST is composed of three individual tools; The formula tool, which calculates the characteristic shear stress when experimental parameters are known, the angle tool which measures the maximal rocking angle set on the cell rocker and the speed tool which measures whole cycle rocking frequency.

#### **Validation of the ShearFAST Formula tool**

The formula tool calculates the characteristic fluid shear stress when the volume of fluid, dish diameter, cycle time, fluid volume and viscosity are known. The results of the formula tool (Figure 4) were validated against the example data from the original publication.

#### **Validation of the ShearFAST angle tool**

A graphical analysis method involved capturing side-on photos of the cell rocker, and measurement of the cell rocker platform angle with respect to 0° using ImageJ (41) (Figure 1).

A second validation utilised an Infrared Optoelectronic 8-camera System (BTS Bioengineering, Milan, Italy) from now on referred to as motion capture analysis (Figure 2).

The 2.2 Megapixel infrared cameras resolution (2048x1088 px, BTS DX 6000 model) tracked the 3D motion of retroreflective markers placed on the rocking platform (1.2 cm in diameter) with a precision of 0.1 mm (see <https://www.btsbioengineering.com/products/smart-dx-motion-capture/>).

## Image J angle analysis

A camera was placed aligned so it could capture a side on view of the cell rocker platform. A smartphone with ShearFAST installed on it was placed on the rocker and the angle tool calibrated to  $0^\circ$  with the aid of a physical spirit level.

An image was taken of the rocker during calibration to allow for later correction of any slight rotation of the camera (Figure1A)

Following calibration, the rocker angle is considered to be  $0^\circ$  as per the spirit level measurements, therefore any apparent rotation of the rocking platform was assumed to be due to a slight camera rotation. The degree required to rotate the image so the platform is perfectly horizontal was determined and applied to the rest of the images after being deemed a suitable approach tested on a second, rotated calibration image (Figure 1B).

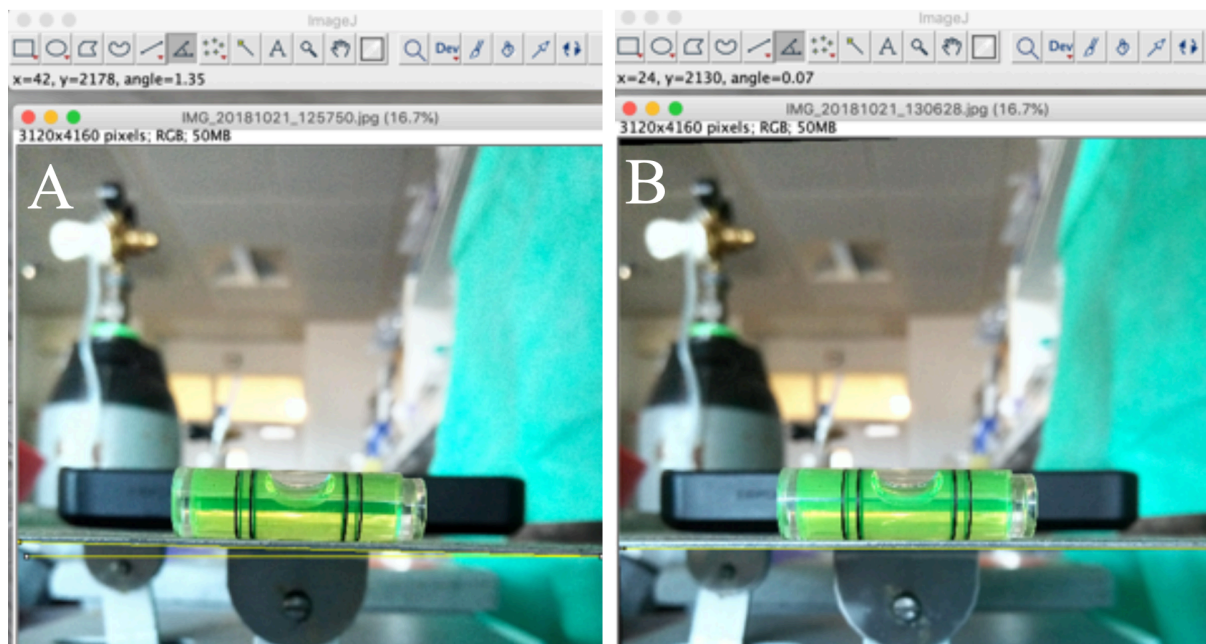

Figure 1. ShearFAST calibration using a spirit level. The leveled platform (A) was used to determine the angle by which the camera capturing the photo was itself offset (B), allowing compensation during ImageJ platform angle analysis.

After calibration, the cell rocker was set to a series of smartphone detected angles, with screenshots taken of the mean angle detected alongside side view images of the cell rocker.

The angles set on the cell rocker images were assessed using the same method, and compared to the measurements obtained using the ShearFAST angle tool.

In a typical cell culture experiment using 35mm plates and 1.5ml media, the authors of the original model recommend avoidance of rocking angle above  $10.2^\circ$  to prevent exposure of the adherent cells to atmosphere. Therefore, 7 angles below this were assessed using the ShearFAST angle tool (Table S1).

### **Motion capture analysis**

To perform motion capture analysis, the cell rocker was placed at the focal point of an 8-camera motion tracking system. Motion capture retroreflective markers were placed on the rocker (Figure 2A), alongside the smartphone housing the ShearFAST and a physical spirit level. The application was calibrated to  $0^\circ$  as before, then the maximal platform rocking angle adjusted to 12 angles falling between  $0-10^\circ$  using the smartphone application (Table S2).

The platform was then set rocking, and mean angle measurements were determined using the SMART ANALYZER software (BTS Bioengineering, version: 1.10.469.0) throughout the rocking period (Figure2B)

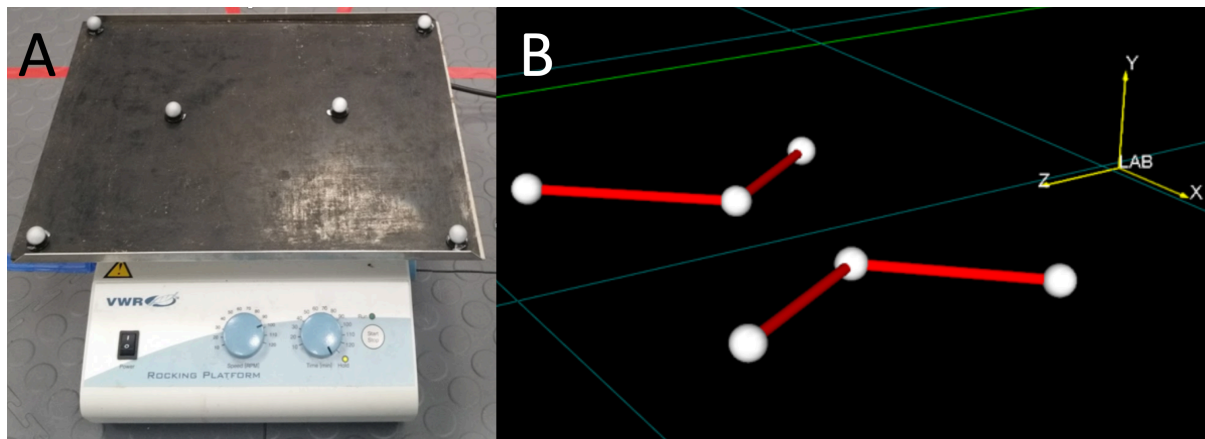

Figure 2. (A) A VWR cell rocker (Cat: 444-0146) which allows manual manipulation of rocking angle and RPM. Six tracking balls were attached to permit detection of rocking angle and cycle frequency. (B) The changes in the geometric position of each tracking ball (i.e.  $x,y,z$  coordinates) was determined using the 8 camera BTS motion tracking system.

### Validation of the Speed tool.

### Video Frequency analysis

The smartphone was placed on cell rocker, which was set to rock at speeds ranging between 30 and 110 rotations per minute (RPM) using dials on the rocker. Using ShearFAST, the acquired waveform was compared to modelled waveforms of user defined frequency until the acquired data was overlaid, granting rapid determination of rocking frequency.

A video was taken of each rocking experiment during ShearFAST data acquisition. The videos were observed alongside a stopwatch with millisecond resolution. A screencast of both video and stopwatch was recorded, and the timepoints at which the cell rocker reached its maximal rocking angle was determined over the course of the video (Figure 3).



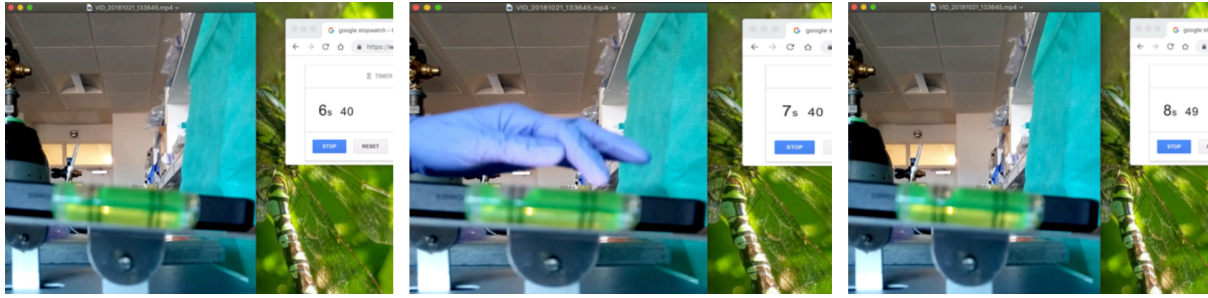

Figure 3. Measurement of cycle time using video analysis. The images show consecutive timepoints at which the rocking platform reached its maximum rocking angle, which were recorded.

At least three timepoints were collected for each rocking speed, subtraction of each timepoint from its preceding timepoint granted the assessment of the mean time taken to complete one full rocking cycle. These were averaged ( $T$ ), permitting calculation of cycle frequency ( $Hz$ ) using Equation 1. The data is reported in Table 1, and correlations between the measurement methods reported in Figure 7.

$$Hz = \frac{1000}{T \text{ ms}}$$

Equation 1: conversion of mean cycle time to rocking frequency simulations and frequency measured during video analysis

### **Motion capture Frequency analysis**

Motion capture frequency analysis granted an assessment of the accuracy and reproducibility of the smartphone frequency measurements. Using the ShearFAST, the rocking frequency was set to 1Hz for three measures, and 0.65Hz for four other measures and compared to the motion capture results (Table 2).

## **Statistical analysis**

Correlations between ShearFAST measurements of rocking angle or frequency and those detected by the other analysis were identified by the Spearman R test. Linear regression was used to determine if the slope generated by ShearFAST measurements of rocking pitch or frequency differed from those detected by the other analysis.

## Results

### Validation of the Formula tool

The formula tool calculates the characteristic fluid shear stress reported in when the volume of fluid, dish diameter, cycle speed, fluid volume and viscosity are known (Figure 4). The FSS calculated by the ShearFAST formula tool was validated against the example data from the original publication's supplementary data (34)

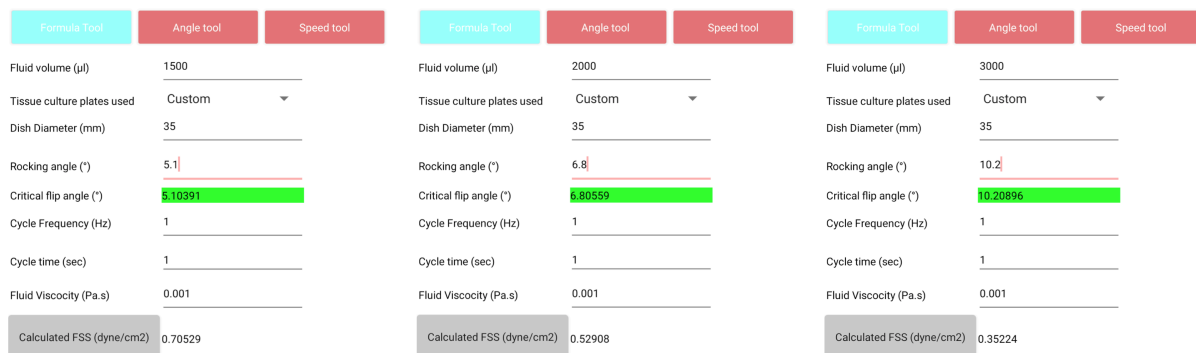

Figure 4. ShearFAST formula tool reproduces the example data reported in the supplementary data of the original publication original publication

### Validation of the Angle tool

#### ImageJ angle analysis

ImageJ angle analysis demonstrated a close association with the smartphone application measurements ( $r=1.0$ ,  $p\leq 0.0004$ ) (5A). The smartphone measurements were around  $0.25^\circ$  higher than those of the graphical analysis (Table S1), but no difference in slope was found between angle measurement methods ( $p>0.84$ ).

## Motion capture angle analysis

On average, ShearFAST angle measures and those attained by motion capture analysis varied by  $0.54 \pm 0.16^\circ$  however this difference was not found to be significant ( $p > 0.32$ ) (Table S2). Angle measures between the two angle assessment methods were found to be correlated ( $R = 0.99$ ,  $p \leq 0.0001$ ) (Figure 5B).

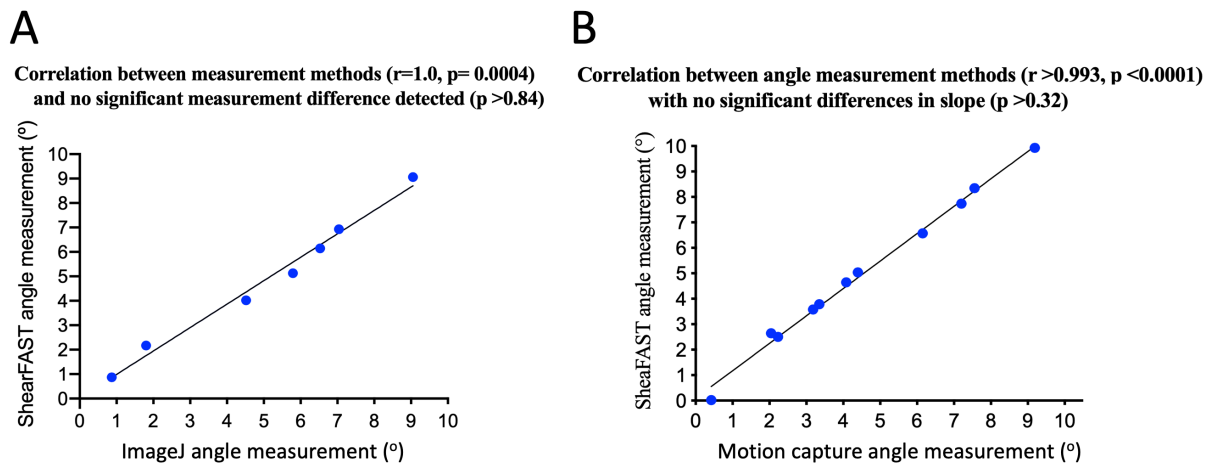

Figure 5. Correlation between pitch measurements detected using ShearFAST and Pitch measurements detected using ImageJ(A) and motion capture analysis (B)

## Video frequency analysis

Video analysis of rocker cycle frequency corroborates the frequency assessment by the smartphone application (Table 1) and (Figure 6), with strong association between measurement techniques ( $r \geq 0.99$ ,  $p \leq 0.0001$ ) and no significant difference detected between the two measurement techniques ( $p = 0.9219$ ) (Figure 7).

| Rocker speed (RPM) | ShearFAST detected frequency (Hz) | Mean cycle time (ms) | Standard deviation cycle time (ms) | Calculated mean frequency (Hz) | Difference in measurement (Hz) | Mean difference (Hz) |
|--------------------|-----------------------------------|----------------------|------------------------------------|--------------------------------|--------------------------------|----------------------|
| 110                | 0.990                             | 1003.333             | 41.833                             | 0.997                          | 0.007                          | 0.006±0.005          |
| 100                | 0.915                             | 1077.778             | 131.128                            | 0.928                          | 0.013                          |                      |
| 90                 | 0.835                             | 1206.000             | 23.022                             | 0.829                          | 0.006                          |                      |
| 80                 | 0.760                             | 1326.667             | 70.356                             | 0.754                          | 0.006                          |                      |
| 70                 | 0.680                             | 1481.111             | 40.756                             | 0.675                          | 0.005                          |                      |
| 60                 | 0.590                             | 1695.714             | 151.751                            | 0.590                          | 0                              |                      |
| 50                 | 0.480                             | 2066.667             | 96.885                             | 0.484                          | 0.004                          |                      |
| 40                 | 0.385                             | 2596.667             | 41.633                             | 0.385                          | 0                              |                      |
| 30                 | 0.290                             | 3600.000             | 105.357                            | 0.278                          | 0.012                          |                      |

*Table 1. The rocking frequency detected by ShearFAST at different rocking speeds.*

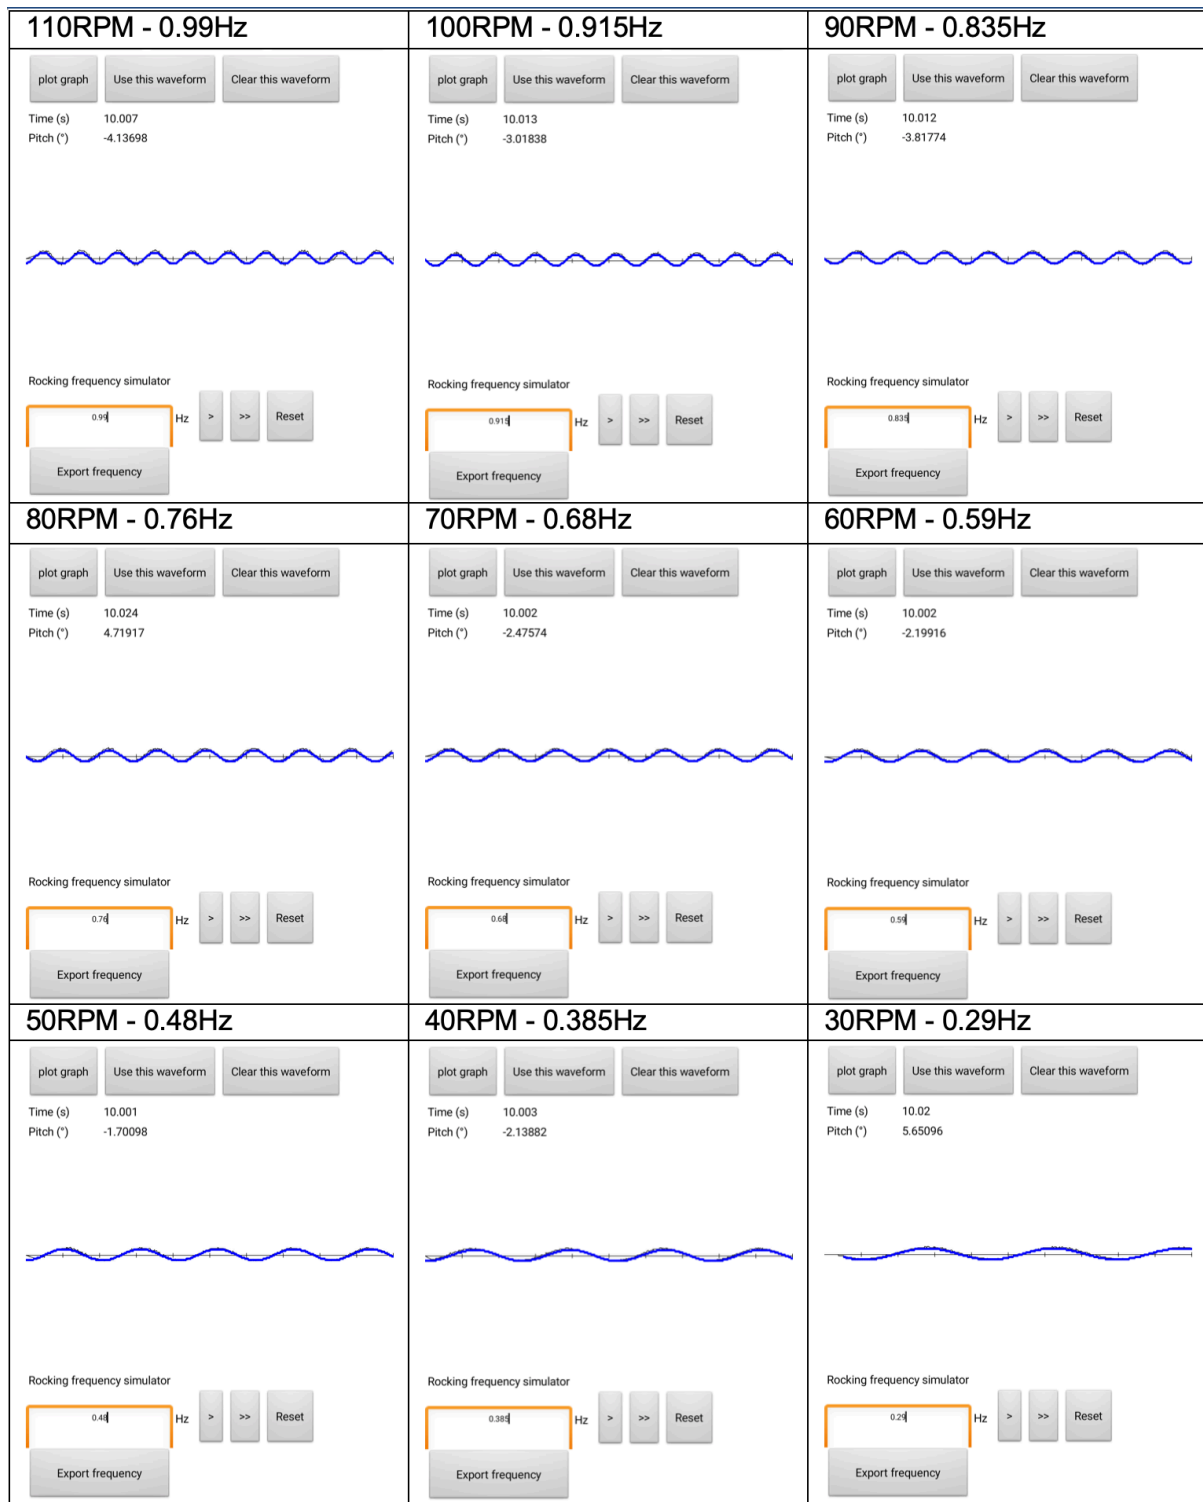

Figure 6. ShearFAST measured rocking frequencies at rocker defined rocking speeds (RPM). Illustrating the value of the ShearFAST approach; when manually selecting the rocking speed 60RPM (i.e. 1Hz) the resulting profile was visibly slower. ShearFAST determined a rocking speed of 0.59Hz which was corroborated by later video analysis (Table 1).

ShearFAST frequency measurements correlate with video analysis of rocking frequency ( $r=0.9996$ ,  $p<0.0001$ ) with no difference in slope detected between methods ( $p>0.62$ )

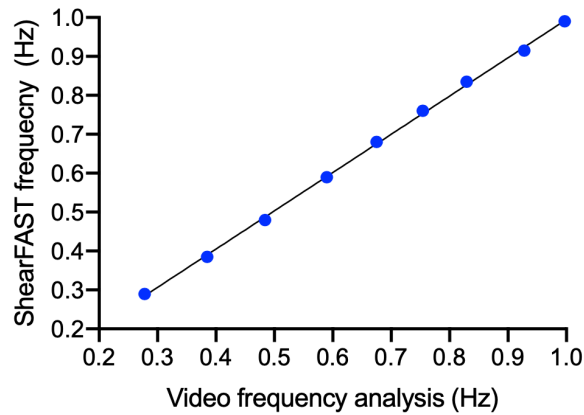

Figure 7. Correlation between ShearFAST frequency measurement and video frequency measurement.

### Motion capture frequency analysis

This analysis revealed a small average difference in frequency assessment of  $0.007 \pm 0.012\text{Hz}$  between measures (Table 2).

| ShearFAST determined frequency (Hz) | Motion capture frequency (Hz) | Difference (Hz) | Mean Difference (Hz) |
|-------------------------------------|-------------------------------|-----------------|----------------------|
| 1.0                                 | 1.035                         | 0.035           | $0.007 \pm 0.012$    |
| 1.0                                 | 0.995                         | 0.005           |                      |
| 1.0                                 | 0.995                         | 0.005           |                      |
| 1.0                                 | 1.0                           | 0.0             |                      |
| 0.65                                | 0.645                         | 0.005           |                      |
| 0.65                                | 0.655                         | 0.005           |                      |
| 0.65                                | 0.65                          | 0.0             |                      |
| 0.65                                | 0.65                          | 0.0             |                      |

Table 2. Reproducible frequency assessment by ShearFAST and motion capture analysis

## Discussion

Within cell line research there is a drive to more accurately simulate physiological environments through the utilization of parallel plate flow chambers, microfluidics and organ-on-a-chip devices. These allow continuous instigation of fluid flow, however arguably diminish the versatility of the cell line approach.

The fixed growth area available to adherent cells cultured in such devices alongside the requirements for separate perfusion circuits restricts both the type and number of the downstream analysis that can be performed.

The cell rocker model was proposed in 2010 (34), and has been utilised to demonstrate important effects of FSS in diverse cell lineages and areas of medical research; (4,35–39).

However, the complexity of the model, including its requirements for mathematical and technical accuracy may be a factor limiting its correct implementation.

ShearFAST provides a user-friendly experience with which to perform high throughput and scalable cell rocker induced cell line experiments in conventional laboratory cultureware.

We demonstrate that the speed tool interface is an effective, intuitive and very efficient means for the determination of whole cycle rocking frequency. ShearFAST measures of rocking frequency correlated strongly with those derived from the real time video analysis, with very small, insignificant and ineffectual differences observed when compared to the video and motion capture analysis (i.e. 0.006Hz and 0.007Hz respectively).

We also found the angle tool measures platform pitch with acceptable degrees of accuracy. No differences in slope were detected by between ShearFAST measured angles and motion capture analysis or graphical analysis.

Consider a hypothetical experiment in which 1.5ml of cell culture media is added to a 35mm dish and rocked at 1Hz. On average, the mean imprecision between the ShearFAST angle tool and the techniques used to validate it were found to be 0.54° for the motion capture analysis and 0.29° for the ImageJ analysis. Assuming perfect accuracy by the validity methods and an angle overestimation by ShearFAST, these mean degrees of imprecision



would result in a characteristic shear stress generation of 0.63 dyne/cm<sup>2</sup> and 0.66 dyne/cm<sup>2</sup> respectively, rather than the mathematically calculated 0.7 dyne/cm<sup>2</sup> resulting from the conditions in the described hypothetical experiment.

Since, as modelled in the original rocker publication, FSS induced during seesaw rocking varies with both cycle time and dish location, these insignificant differences detected in pitch measurements are offset by the potential of ShearFAST to foster simple, reproducible and high throughput FSS experiments.

The ShearFAST FSS induction method is compatible with high throughput apparatus to control additional extracellular environments, such as oxygen availability using hypoxia chambers. We performed the example screen under fluid anoxia using a nitrogen purged hypoxia chamber, thus we can be confident the protective effect of FSS observed did not stem from improved oxygen delivery to the submerged monolayers.

Cultured proximal tubule cells have been shown to respond dynamically to fluid shear stress, changing both their phenotype (44), reabsorptive activities (1) as well as the 3D actin structure of their cytoskeleton (45).

We found the mean differences in cellular viability caused by generation of fluid flux to be small (i.e. instigation of 1 dyne/cm<sup>2</sup> resulted in a 7% improvement in viability when compared to cells stored under fluid stasis).

This emphasizes the value of the ShearFAST assisted cell rocker model. Unlike alternative methods of FSS induction, it is simple and economical to perform large numbers of technical or biological replicates using the multiwell plate format. Through this advantage, the effects of biological variation between experiments may be silenced, leading to enhanced detection of small changes conferred by fluid movement in the extracellular environment.

Additionally, ShearFAST permits the generation of different degrees of FSS in the same experiment. The volume of fluid used is a variable governing the FSS generated under the same rocking profile. When paired with static parallel plates containing the same volumes of fluid, this phenomenon may be manipulated within ShearFAST to perform a 'dose response' of FSS induction.

## **Conclusions**

ShearFAST is a useful tool which facilitates the rapid execution of fluid shear stress experiments using a cell rocker. The mobile format of the software permits instant user acquisition through established smartphone application providers, while the user interface provides an intuitive means with which to accurately measure the rocking profile on a standard laboratory cell rocker. The costless execution of ShearFAST assisted cell are particularly useful for proof of concept studies, and is applicable for research involving adherent cell lines.

## **Acknowledgements:**

The authors would like to thank Kalliopy Tabry for her invaluable contributions to this work. This work was supported by a generous grant from University Hospital Birmingham Charities.

## **Conflict of Interest:**

The authors declare no conflicts of interest.

## References

1. Raghavan V, Rbaibi Y, Pastor-Soler NM, Carattino MD, Weisz OA. Shear stress-dependent regulation of apical endocytosis in renal proximal tubule cells mediated by primary cilia. *Proc Natl Acad Sci U S A* [Internet]. 2014 Jun 10 [cited 2016 Apr 27];111(23):8506–11. Available from: <http://www.pubmedcentral.nih.gov/articlerender.fcgi?artid=4060694&tool=pmcentrez&rendertype=abstract>
2. Miravète M, Klein J, Besse-Patin A, Gonzalez J, Pecher C, Bascands J-L, et al. Renal tubular fluid shear stress promotes endothelial cell activation [Internet]. Vol. 407, *Biochemical and Biophysical Research Communications*. 2011 [cited 2017 Jun 23]. Available from: <http://www.sciencedirect.com/science/article/pii/S0006291X1100516X>
3. Gong X, Yang W, Wang L, Duncan RL, Pan J. Prostaglandin E2 modulates F-actin stress fiber in FSS-stimulated MC3T3-E1 cells in a PKA-dependent manner. *Acta Biochim Biophys Sin (Shanghai)* [Internet]. 2014 Jan [cited 2019 May 5];46(1):40–7. Available from: <http://www.ncbi.nlm.nih.gov/pubmed/24296051>
4. Michael Delaine-Smith R, Javaheri B, Helen Edwards J, Vazquez M, Rumney RMH. Preclinical models for in vitro mechanical loading of bone-derived cells. *Bonekey Rep* [Internet]. 2015 [cited 2019 May 5];4:728. Available from: <http://www.ncbi.nlm.nih.gov/pubmed/26331007>
5. Cha B, Geng X, Mahamud MR, Fu J, Mukherjee A, Kim Y, et al. Mechanotransduction activates canonical Wnt/ $\beta$ -catenin signaling to promote lymphatic vascular patterning and the development of lymphatic and lymphovenous valves. *Genes Dev* [Internet]. 2016 Jun 15 [cited 2017 Jul 20];30(12):1454–69. Available from: <http://www.ncbi.nlm.nih.gov/pubmed/27313318>
6. Wahle A, Lopez JJ, Olszewski ME, Vigmostad SC, Chandran KB, Rossen JD, et al. Plaque development, vessel curvature, and wall shear stress in coronary arteries assessed by X-ray angiography and intravascular ultrasound. *Med Image Anal* [Internet]. 2006 Aug [cited 2016 May 19];10(4):615–31. Available from: <http://www.pubmedcentral.nih.gov/articlerender.fcgi?artid=2590653&tool=pmcentrez&rendertype=abstract>
7. Maschmeyer I, Lorenz AK, Schimek K, Hasenberg T, Ramme AP, Hübner J, et al. A four-organ-chip for interconnected long-term co-culture of human intestine, liver, skin and kidney equivalents. *Lab Chip* [Internet]. 2015 Jun 21 [cited 2016 Mar 14];15(12):2688–99. Available from: <http://www.ncbi.nlm.nih.gov/pubmed/25996126>
8. Barnes JM, Nauseef JT, Henry MD. Resistance to Fluid Shear Stress Is a Conserved Biophysical Property of Malignant Cells. Olson MF, editor. *PLoS One* [Internet]. 2012 Dec 3 [cited 2019 May 5];7(12):e50973. Available from: <https://dx.plos.org/10.1371/journal.pone.0050973>
9. Heo K-S, Fujiwara K, Abe J. Shear stress and atherosclerosis. *Mol Cells* [Internet]. 2014 Jun [cited 2019 May 5];37(6):435–40. Available from: <http://www.ncbi.nlm.nih.gov/pubmed/24781409>
10. Tang X, Jin J, Huang S, Xin Y, Tan Y. Blood Shear Stress Selects Metastasis-Initiating Cells with Metastatic Advantages. *Biophys J* [Internet]. 2018 Feb 2 [cited 2019 May 5];114(3):325a. Available from: <https://linkinghub.elsevier.com/retrieve/pii/S0006349517330540>
11. Huang Q, Hu X, He W, Zhao Y, Hao S, Wu Q, et al. Fluid shear stress and tumor metastasis. *Am J Cancer Res* [Internet]. 2018 [cited 2019 May 5];8(5):763–77. Available from: <http://www.ncbi.nlm.nih.gov/pubmed/29888101>
12. Molladavoodi S, Robichaud M, Wulff D, Gorbet M. Corneal epithelial cells exposed to shear stress show altered cytoskeleton and migratory behaviour. *PLoS One* [Internet]. 2017 [cited 2019 May 5];12(6):e0178981. Available from: <http://www.ncbi.nlm.nih.gov/pubmed/28662184>
13. Garcia-Polite F, Martorell J, Del Rey-Puech P, Melgar-Lesmes P, O'Brien CC, Roquer J, et al. Pulsatility and high shear stress deteriorate barrier phenotype in brain

- microvascular endothelium. *J Cereb Blood Flow Metab* [Internet]. 2017 Jul 4 [cited 2019 May 5];37(7):2614–25. Available from: <http://journals.sagepub.com/doi/10.1177/0271678X16672482>
14. Saxer T, Zumbuehl A, Müller B. The use of shear stress for targeted drug delivery. *Cardiovasc Res* [Internet]. 2013 Jul 15 [cited 2019 May 5];99(2):328–33. Available from: <https://academic.oup.com/cvres/article-lookup/doi/10.1093/cvr/cvt102>
  15. Houston P, White BP, Campbell CJ, Braddock M. Delivery and Expression of Fluid Shear Stress-Inducible Promoters to the Vessel Wall: Applications for Cardiovascular Gene Therapy. *Hum Gene Ther* [Internet]. 1999 Dec 10 [cited 2019 May 5];10(18):3031–44. Available from: <http://www.ncbi.nlm.nih.gov/pubmed/10609662>
  16. Sato Y, Tsukada K, Hatakeyama K. Role of shear stress and immune responses in liver regeneration after a partial hepatectomy. *Surg Today* [Internet]. 1999 Jan [cited 2019 May 5];29(1):1–9. Available from: <http://www.ncbi.nlm.nih.gov/pubmed/9934824>
  17. Tian S, Bai Y, Yang L, Wang X, Wu Y, Jia J, et al. Shear Stress Inhibits Apoptosis of Ischemic Brain Microvascular Endothelial Cells. *Int J Mol Sci* [Internet]. 2013 Jan 11 [cited 2019 May 5];14(1):1412–27. Available from: <http://www.mdpi.com/1422-0067/14/1/1412>
  18. Thury A, van Langenhove G, Carlier SG, Albertal M, Kozuma K, Regar E, et al. High shear stress after successful balloon angioplasty is associated with restenosis and target lesion revascularization. *Am Heart J* [Internet]. 2002 Jul [cited 2019 May 5];144(1):136–43. Available from: <http://www.ncbi.nlm.nih.gov/pubmed/12094200>
  19. Moers C, Pirenne J, Paul A, Ploeg RJ. Machine perfusion or cold storage in deceased-donor kidney transplantation. *N Engl J Med* [Internet]. 2012 Feb 23 [cited 2015 Nov 3];366(8):770–1. Available from: <http://www.ncbi.nlm.nih.gov/pubmed/22356343>
  20. Moers C, Smits JM, Maathuis M-HJ, Treckmann J, van Gelder F, Napieralski BP, et al. Machine Perfusion or Cold Storage in Deceased-Donor Kidney Transplantation. *N Engl J Med* [Internet]. 2009 Jan [cited 2016 Sep 3];360(1):7–19. Available from: <http://www.nejm.org/doi/abs/10.1056/NEJMoa0802289>
  21. Kox J, Moers C, Monbaliu D, Strelniece A, Treckmann J, Jochmans I, et al. The Benefits of Hypothermic Machine Preservation and Short Cold Ischemia Times in Deceased Donor Kidneys. *Transplantation* [Internet]. 2018 Aug [cited 2019 May 5];102(8):1344–50. Available from: <http://www.ncbi.nlm.nih.gov/pubmed/29570164>
  22. Patel K, Smith TB, Neil DAH, Thakker A, Tsuchiya Y, Higgs EB, et al. The Effects of Oxygenation on Ex Vivo Kidneys Undergoing Hypothermic Machine Perfusion. *Transplantation* [Internet]. 2019 Feb [cited 2019 Mar 3];103(2):314–22. Available from: <http://www.ncbi.nlm.nih.gov/pubmed/30461718>
  23. Jochmans I, Moers C, Smits JM, Leuvenink HGD, Treckmann J, Paul A, et al. The Prognostic Value of Renal Resistance During Hypothermic Machine Perfusion of Deceased Donor Kidneys. *Am J Transplant* [Internet]. 2011 Oct [cited 2019 May 5];11(10):2214–20. Available from: <http://www.ncbi.nlm.nih.gov/pubmed/21834917>
  24. Lo Faro ML, Akhtar MZ, Boffa C, Ploeg R. Should Pulsatile Preservation Be the Gold Standard in Kidney Transplantation? *Curr Transplant Reports* [Internet]. 2015 Jun 15 [cited 2019 May 5];2(2):105–12. Available from: <http://link.springer.com/10.1007/s40472-015-0063-8>
  25. Patel SK, Pankewycz OG, Nader ND, Zachariah M, Kohli R, Laftavi MR. Prognostic Utility of Hypothermic Machine Perfusion in Deceased Donor Renal Transplantation. *Transplant Proc* [Internet]. 2012 Sep [cited 2019 May 5];44(7):2207–12. Available from: <http://www.ncbi.nlm.nih.gov/pubmed/22974956>
  26. Wan C, Wang C, Liu T, Wang H, Yang Z. Experimental study on the cryopreservation of LLC-PK1 epithelial cells with hypoxic UW solution. *J Huazhong Univ Sci Technolog Med Sci* [Internet]. 2007 Aug [cited 2016 Aug 26];27(4):426–8. Available from: <http://www.ncbi.nlm.nih.gov/pubmed/17828502>
  27. Dutheil D, Rioja-Pastor I, Tallineau C, Goujon J-M, Hauet T, Mauco G, et al. Protective Effect of PEG 35 000 Da on Renal Cells: Paradoxical Activation of JNK

- Signaling Pathway During Cold Storage. *Am J Transplant* [Internet]. 2006 Jul [cited 2015 Sep 30];6(7):1529–40. Available from: <http://doi.wiley.com/10.1111/j.1600-6143.2006.01343.x>
28. Neuhaus W, Schick MA, Bruno RR, Schneiker B, Förster CY, Roewer N, et al. The effects of colloid solutions on renal proximal tubular cells in vitro. *Anesth Analg* [Internet]. 2012 Feb [cited 2016 Aug 4];114(2):371–4. Available from: <http://www.ncbi.nlm.nih.gov/pubmed/22025492>
  29. Sung JH, Kam C, Shuler ML. A microfluidic device for a pharmacokinetic-pharmacodynamic (PK-PD) model on a chip. *Lab Chip* [Internet]. 2010 Feb 21 [cited 2016 Apr 14];10(4):446–55. Available from: <http://www.ncbi.nlm.nih.gov/pubmed/20126684>
  30. Frohlich EM, Zhang X, Charest JL. The use of controlled surface topography and flow-induced shear stress to influence renal epithelial cell function. *Integr Biol (Camb)* [Internet]. 2012 Jan 1 [cited 2016 Apr 14];4(1):75–83. Available from: <http://pubs.rsc.org/en/Content/ArticleHTML/2012/IB/C1IB00096A>
  31. Spruell C, Baker AB. Analysis of a high-throughput cone-and-plate apparatus for the application of defined spatiotemporal flow to cultured cells. *Biotechnol Bioeng* [Internet]. 2013 Jun [cited 2016 Aug 24];110(6):1782–93. Available from: <http://www.ncbi.nlm.nih.gov/pubmed/23280552>
  32. Esch MB, Mahler GJ, Stokol T, Shuler ML. Body-on-a-chip simulation with gastrointestinal tract and liver tissues suggests that ingested nanoparticles have the potential to cause liver injury. *Lab Chip* [Internet]. 2014 Aug 21 [cited 2016 Mar 22];14(16):3081–92. Available from: <http://www.pubmedcentral.nih.gov/articlerender.fcgi?artid=4144667&tool=pmcentrez&rendertype=abstract>
  33. Kotsis F, Nitschke R, Boehlke C, Bashkurov M, Walz G, Kuehn EW. Ciliary calcium signaling is modulated by kidney injury molecule-1 (Kim1). *Pflügers Arch Eur J Physiol* [Internet]. 2007 Mar [cited 2016 Aug 3];453(6):819–29. Available from: <http://www.ncbi.nlm.nih.gov/pubmed/17205356>
  34. Zhou X, Liu D, You L, Wang L. Quantifying fluid shear stress in a rocking culture dish. *J Biomech* [Internet]. 2010 May 28 [cited 2016 Apr 26];43(8):1598–602. Available from: <http://www.pubmedcentral.nih.gov/articlerender.fcgi?artid=2866761&tool=pmcentrez&rendertype=abstract>
  35. Chen JC, Chua M, Bellon RB, Jacobs CR. Epigenetic changes during mechanically induced osteogenic lineage commitment. *J Biomech Eng* [Internet]. 2015 Feb 1 [cited 2019 May 5];137(2):020902. Available from: <http://www.ncbi.nlm.nih.gov/pubmed/25581684>
  36. Srinivasan PP, Parajuli A, Price C, Wang L, Duncan RL, Kirn-Safran CB. Inhibition of T-Type Voltage Sensitive Calcium Channel Reduces Load-Induced OA in Mice and Suppresses the Catabolic Effect of Bone Mechanical Stress on Chondrocytes. *PLoS One* [Internet]. 2015 [cited 2019 May 5];10(5):e0127290. Available from: <http://www.ncbi.nlm.nih.gov/pubmed/26011709>
  37. Oliazadeh N, Gorman KF, Eveleigh R, Bourque G, Moreau A. Identification of Elongated Primary Cilia with Impaired Mechanotransduction in Idiopathic Scoliosis Patients. *Sci Rep* [Internet]. 2017 [cited 2019 May 5];7:44260. Available from: <http://www.ncbi.nlm.nih.gov/pubmed/28290481>
  38. Hyler AR, Baudoin NC, Brown MS, Stremmler MA, Cimini D, Davalos R V, et al. Fluid shear stress impacts ovarian cancer cell viability, subcellular organization, and promotes genomic instability. *PLoS One* [Internet]. 2018 [cited 2019 May 5];13(3):e0194170. Available from: <http://www.ncbi.nlm.nih.gov/pubmed/29566010>
  39. Wang W, Sarazin BA, Kornilowicz G, Lynch ME. Mechanically-Loaded Breast Cancer Cells Modify Osteocyte Mechanosensitivity by Secreting Factors That Increase Osteocyte Dendrite Formation and Downstream Resorption. *Front Endocrinol (Lausanne)* [Internet]. 2018 [cited 2019 May 5];9:352. Available from:

- <http://www.ncbi.nlm.nih.gov/pubmed/30034365>
40. Li M, Xu S, Mazilu D, Turkbey B, Wood BJ. Smartglasses/smartphone needle guidance AR system for transperineal prostate procedure. In: Fei B, Linte CA, editors. *Medical Imaging 2019: Image-Guided Procedures, Robotic Interventions, and Modeling* [Internet]. SPIE; 2019 [cited 2019 May 5]. p. 34. Available from: <https://www.spiedigitallibrary.org/conference-proceedings-of-spie/10951/2512250/Smartglassessmartphone-needle-guidance-AR-system-for-transperineal-prostate-procedure/10.1117/12.2512250.full>
  41. Rueden CT, Schindelin J, Hiner MC, DeZonia BE, Walter AE, Arena ET, et al. ImageJ2: ImageJ for the next generation of scientific image data. *BMC Bioinformatics* [Internet]. 2017 Dec 29 [cited 2019 Jul 17];18(1):529. Available from: <http://www.ncbi.nlm.nih.gov/pubmed/29187165>
  42. Aschauer L, Gruber LN, Pfaller W, Limonciel A, Athersuch TJ, Cavill R, et al. Delineation of the key aspects in the regulation of epithelial monolayer formation. *Mol Cell Biol* [Internet]. 2013 Jul [cited 2015 Nov 10];33(13):2535–50. Available from: <http://www.pubmedcentral.nih.gov/articlerender.fcgi?artid=3700122&tool=pmcentrez&rendertype=abstract>
  43. Vichai V, Kirtikara K. Sulforhodamine B colorimetric assay for cytotoxicity screening. *Nat Protoc* [Internet]. 2006 Aug 17 [cited 2017 Oct 20];1(3):1112–6. Available from: <http://www.nature.com/doi/10.1038/nprot.2006.179>
  44. Timsit M-O, Adams WJ, Laguna-Fernandez A, Ichimura T, Bonventre J V, García-Cardena G, et al. Flow is critical for maintaining a protective phenotype in renal proximal tubular cells. *Am J Transplant* [Internet]. 2013 Jun [cited 2016 Aug 9];13(6):1617–8. Available from: <http://www.ncbi.nlm.nih.gov/pubmed/23617882>
  45. Duan Y, Gotoh N, Yan Q, Du Z, Weinstein AM, Wang T, et al. Shear-induced reorganization of renal proximal tubule cell actin cytoskeleton and apical junctional complexes. *Proc Natl Acad Sci U S A* [Internet]. 2008 Aug 12 [cited 2016 May 17];105(32):11418–23. Available from: <http://www.pnas.org/content/105/32/11418.long>
